# Supplementary material for: Phenotypic and Functional Consequences of PLT Binding to Monocytes and Its Association with Clinical Features in SLE
Source: MDPI journal article supplement (doi:10.3390/ijms22094719), 2021-04-29
Supplement: s1 [file s1]

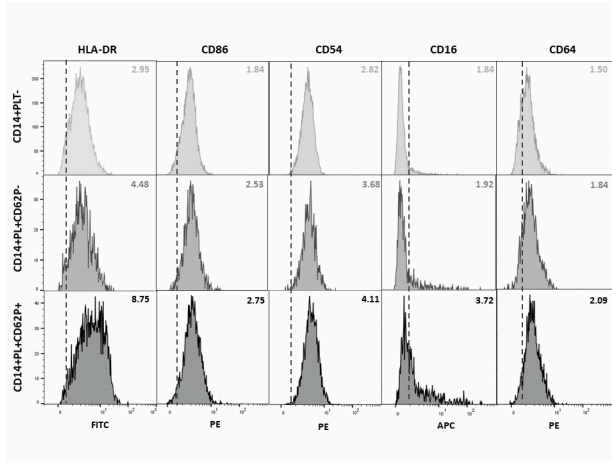

**Figure S1. Phenotype of monocytes without platelets (CD14+PLT-) and with non-activated (CD14+PLT+CD62P-) or activated (CD14+PLT+CD62P+) platelets in HD.** Expression of HLA-DR, CD86, CD54, CD16 and CD64 on CD14+PLT- (light grey), CD14+PLT+CD62P- (dark grey) or CD14+PLT+CD62P+ (black). Dotted line indicates positivity threshold. Representative experiment is shown from 16 independent experiments. Data are expressed as gMFI (geometric mean fluorescence intensity) of gated monocytes.

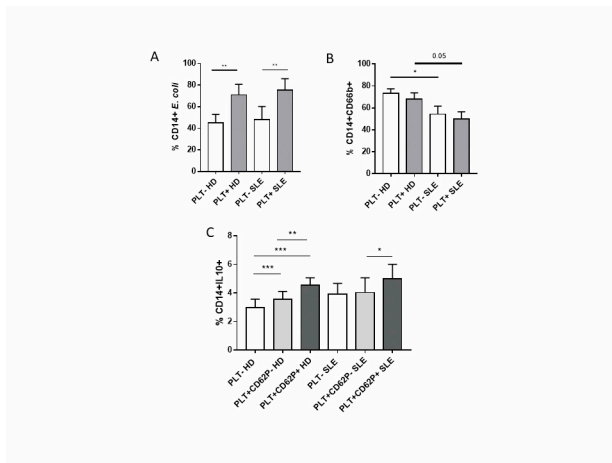

**Figure S2. Functional characterization of monocytes with bound platelets in SLE patients.** (A) Phagocytosis of *E. coli* (n=8), (B) Efferocytosis (n=8) and (C) IL-10 secretion (n=9). Error bars correspond to SEM. Data are shown for 3 (A), 8 (B) and 6 (C) independent experiments. Statistical analysis was performed using the paired t-test for comparison between monocytes from HD or from SLE patients and t-test or the one-way ANOVA with Tukey's multiple comparisons test for comparison between HD and SLE patients. \*p<0.05, \*\*p<0.01, and \*\*\*p<0.001.

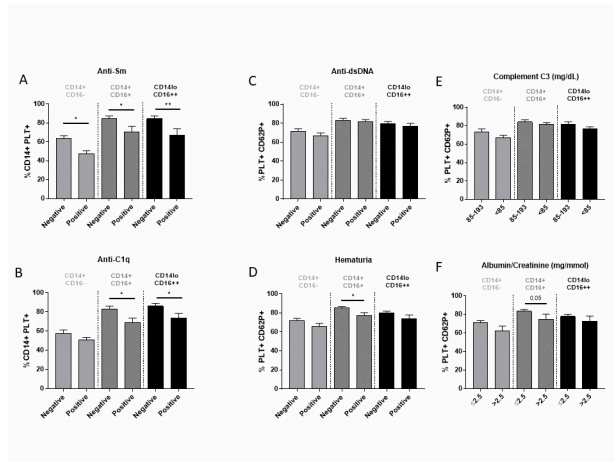

**Figure S3. Percentage of monocyte subsets with bound platelets and activated bound platelets in SLE patients according to clinical features.** Comparison of percentages of monocyte subsets with bound platelets (CD14+PLT+) in SLE patients segregated according to (A) positive or negative anti-Sm, (B) positive or negative anti-C1q. Comparison of percentages of monocyte subsets with activated bound platelets (PLT+ CD62P+) in SLE patients segregated according to (C) positive or negative anti-dsDNA, (D) positive or negative haematuria, (E) <85 or 85-193 mg/dl of C3 and (F) >2.5 or ≤2.5 mg/mmol of albumin/creatinine are shown (n=49). Error bars correspond to SEM. Statistical analysis was performed using the t-test. \*p < 0.05, \*\*p < 0.01.

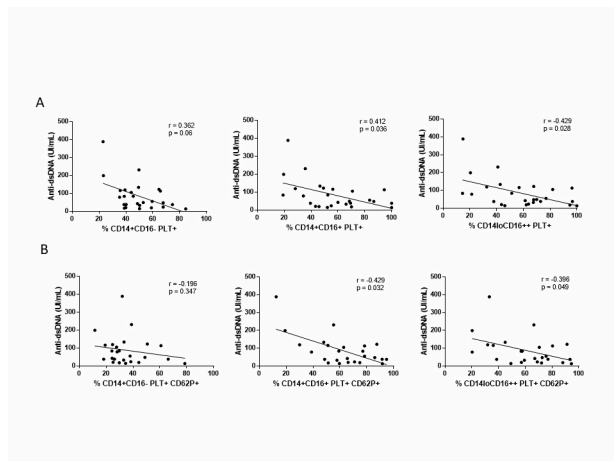

**Figure S4. Correlation of monocyte subsets with bound platelets and activated bound platelets with anti-dsDNA titers in SLE patients.** (A) Correlation of the percentage of monocyte subsets with bound platelets (PLT+) with anti-dsDNA titers in SLE patients (n=26). (B) Correlation of percentage of monocyte subsets with activated bound platelets (PLT+ CD62P+) with anti-dsDNA titers in SLE patients (n=26). Statistical analysis was performed using Pearson's correlation.

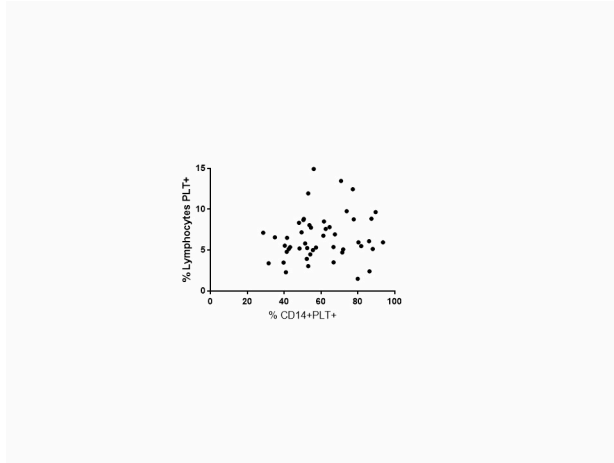

**Figure S5. Correlation of monocyte with bound platelets and lymphocytes with bound platelets in SLE patients.** (n=48) Statistical analysis was performed using Pearson's correlation.

**Table S1. Expression of HLA-DR, CD86, CD54, CD16 and CD64 on monocytes without bound platelets (CD14+PLT-), monocytes with non-activated (CD14+PLT+CD62P-) or activated bound platelets (CD14+PLT+CD62P+) in HD and SLE patients.** Data are expressed as the mean  $\pm$  SD values of gMFI of 35 independent experiments (16 HD and 35 SLE patients). Statistical analysis was performed using the one-way ANOVA with Tukey's multiple comparisons test. gMFI, geometric mean fluorescence intensity, SD, standard deviation.

|        |     | CD14+PLT-<br>(gMFI, $\bar{x} \pm SD$ )<br>(a) | CD14+PLT+CD62P-<br>(gMFI, $\bar{x} \pm SD$ )<br>(b) | CD14+PLT+CD62P+<br>(gMFI, $\bar{x} \pm SD$ )<br>(c) | ANOVA | (a) Vs.<br>(b) | (a) Vs.<br>(c) | (b) Vs.<br>(c) |
|--------|-----|-----------------------------------------------|-----------------------------------------------------|-----------------------------------------------------|-------|----------------|----------------|----------------|
| HLA-DR | HD  | 4.27 $\pm$ 1.34                               | 4.64 $\pm$ 1.66                                     | 7.67 $\pm$ 2.8                                      | <0.01 | ns             | <0.01          | <0.01          |
|        | SLE | 4.18 $\pm$ 1.25                               | 4.37 $\pm$ 1.5                                      | 7.63 $\pm$ 2.4                                      | <0.01 | ns             | <0.01          | <0.01          |
| CD86   | HD  | 2.43 $\pm$ 0.58                               | 2.87 $\pm$ 0.56                                     | 3.87 $\pm$ 1.36                                     | 0.07  | <0.01          | <0.01          | ns             |
|        | SLE | 2.14 $\pm$ 0.65                               | 2.41 $\pm$ 0.65                                     | 2.9 $\pm$ 0.9                                       | <0.01 | <0.01          | <0.01          | <0.01          |
| CD54   | HD  | 1.87 $\pm$ 0.5                                | 2.25 $\pm$ 0.8                                      | 2.92 $\pm$ 1.66                                     | 0.04  | <0.01          | <0.01          | ns             |
|        | SLE | 2.06 $\pm$ 0.63                               | 2.41 $\pm$ 0.69                                     | 2.83 $\pm$ 0.69                                     | <0.01 | <0.01          | <0.01          | <0.01          |
| CD16   | HD  | 1.7 $\pm$ 0.89                                | 2.33 $\pm$ 1.25                                     | 2.8 $\pm$ 1.85                                      | 0.01  | 0.04           | 0.02           | ns             |
|        | SLE | 1.84 $\pm$ 1.08                               | 2.48 $\pm$ 2.05                                     | 2.6 $\pm$ 1.55                                      | 0.03  | ns             | <0.01          | ns             |
| CD64   | HD  | 0.88 $\pm$ 0.29                               | 1.12 $\pm$ 0.51                                     | 1.18 $\pm$ 0.4                                      | 0.01  | ns             | <0.01          | ns             |
|        | SLE | 1.18 $\pm$ 0.49                               | 1.26 $\pm$ 0.45                                     | 1.43 $\pm$ 0.49                                     | <0.01 | 0.01           | <0.01          | <0.01          |
